# Supplementary material
Source: Springer Nature journal article supplement (https://www.springermedizin.de/resource/supplementary/12889_2013_6790_MOESM4_ESM.pdf/9498612)
Supplement: MOESM4 [file 9498612]

**A**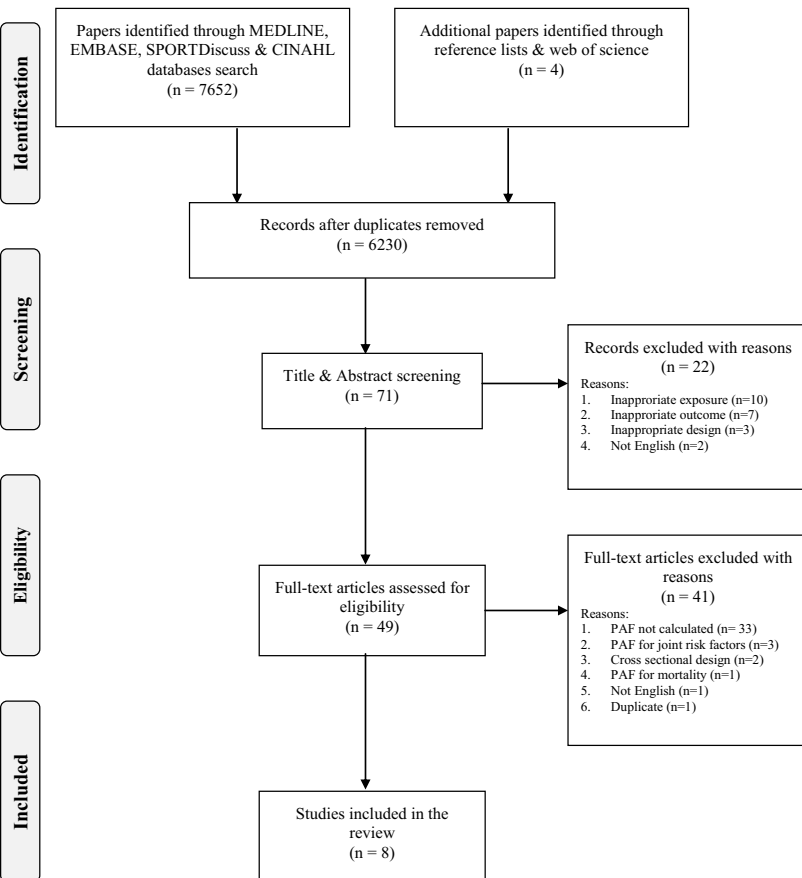**B**

1 diabetes.mp. (379144)

2 diabetic\$.mp. (192522)

3 diabetes mellitus/ or \*diabetes mellitus, type 2/ or \*prediabetic state/ (146769)

4 1 or 2 or 3 (429966)

5 physical activit\$.mp. (51021)

6 physical inactivity.mp. (3541)

7 fitness.mp. (48520)

8 Physical Fitness/ (20584)

9 Sedentary Lifestyle/ (1816)

10 cardiorespiratory fitness.mp. (1697)

11 Motor Activity/ (71159)

12 exp sports/ or running/ or jogging/ or walking/ or weight lifting/ (103461)

13 exp exercise/ or muscle stretching exercises/ or plyometric exercise/ or resistance training/ or physical fitness/ (115143)

14 \*Physical Exertion/ (31429)

15 5 or 6 or 7 or 8 or 9 or 10 or 11 or 12 or 13 or 14 (303015)

16 4 and 15 (13110)

17 population attributable fraction.mp. (410)

18 excess risk.mp. (4051)

19 attributable risk.mp. (2272)

20 population attributable risk.mp. (1198)

21 exp morbidity/ or incidence/ or prevalence/ (339813)

22 exp risk/ or logistic models/ or risk assessment/ or risk factors/ (764962)

23 17 or 18 or 19 or 20 or 21 or 22 (989461)

24 16 and 23 (4748)

25 limit 24 to "all adult (19 plus years)" (3329)
